# Supplementary figures and images for: M2 type Macrophages promote OSCC progress via conferring resistance to Erastin-induced ferroptosis
Source: Research Square preprint supplement (doi:10.21203/rs.3.rs-7157629/v1), 2025-08-05

Fig.2  
CAL27

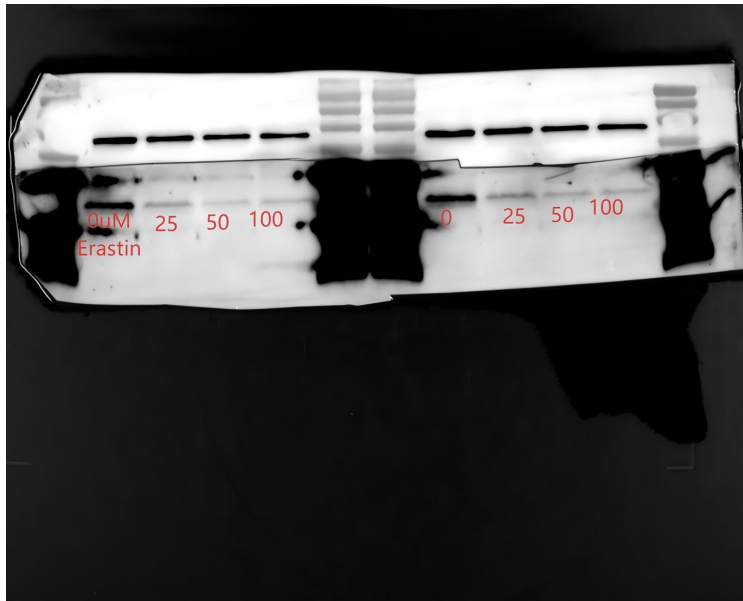

Fig.2  
HN6

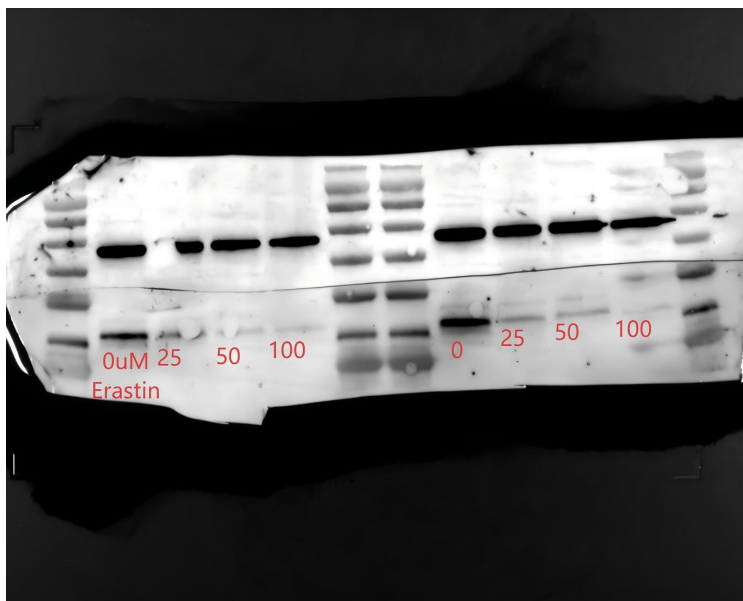

Fig. 4  
Various cell lines

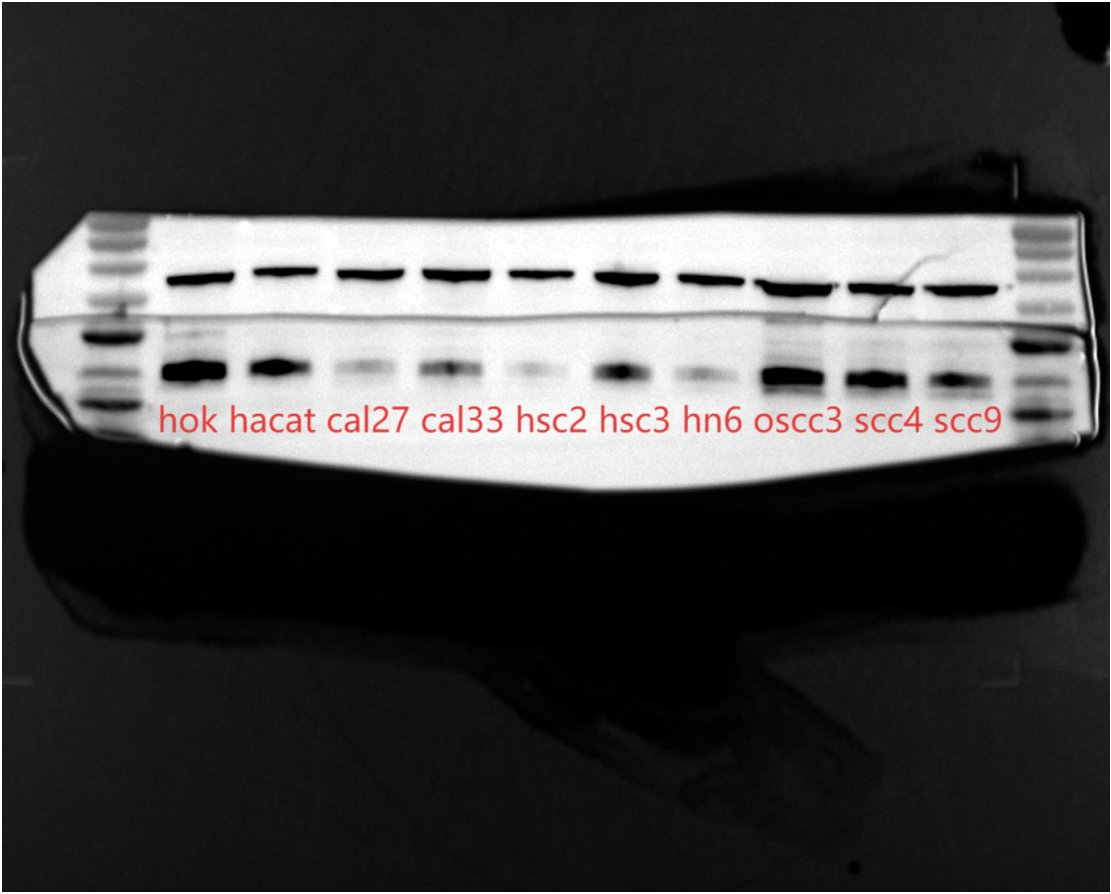

Fig.4  
CAL27

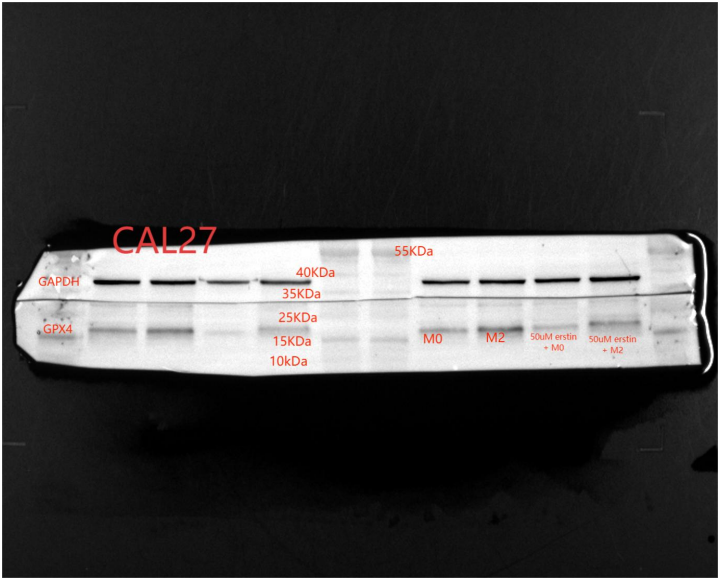

Fig.4

HN6 exposure time: 60s

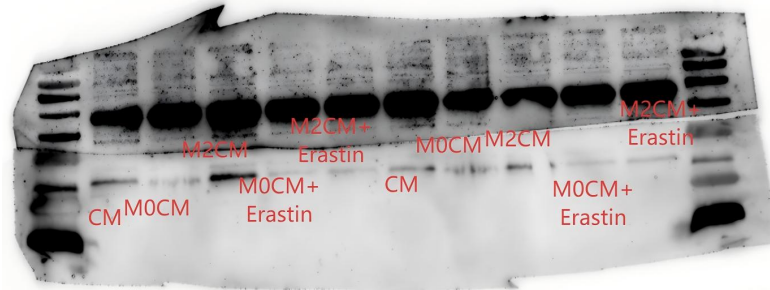

Fig.4

HN6 exposure time: 120s

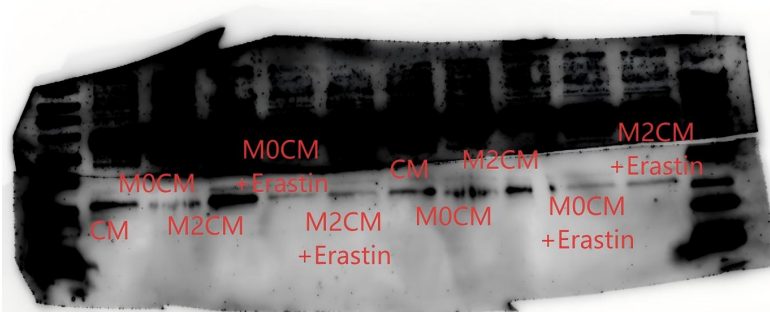

Supplement: Supplementary file 1 [file 69c587cbacd876d7c0290bf9.pdf]
